# Supplementary material for: Electronic Structures of Radical-Pair-Forming Cofactors in a Heliobacterial Reaction Center
Source: MDPI journal article supplement (doi:10.3390/molecules29051021), 2024-02-27
Supplement: s1 [file s1]

# Electronic Structures of Radical-Pair-Forming Cofactors in a Heliobacterial Reaction Center

Yunmi Kim <sup>1</sup>, A. Alia <sup>2,3</sup>, Patrick Kurle-Tucholski <sup>1</sup>, Christian Wiebeler <sup>1,4</sup> and Jörg Matysik <sup>1,\*</sup>

<sup>1</sup> Institut für Analytische Chemie, Universität Leipzig, Linnéstraße 3, D-04103 Leipzig, Germany; yunmi.kim@uni-leipzig.de (Y.K.); patrick.kurle@uni-leipzig.de (P.K.-T.); christian.wiebeler@uni-a.de (C.W.)

<sup>2</sup> Leiden Institute of Chemistry, Leiden University, Einsteinweg 55, 2301 RA Leiden, The Netherlands, alia.aliamatysik@medizin.uni-leipzig.de (A.A.)

<sup>3</sup> Institut für Medizinische Physik und Biophysik, Universität Leipzig, Härtelstr. 16-18, D-04107 Leipzig, Germany

<sup>4</sup> Institut für Physik, Universität Augsburg, Universitätsstraße 1, D-86159 Augsburg, Germany

\* Correspondence: joerg.matysik@uni-leipzig.de; Tel.: +49-341-9736112 (J.M.)

## Supporting Information Available

Figure S1. Comparison of  $^{13}\text{C}$  photo-CIDNP MAS NMR spectra from  $^{13}\text{C}$  natural abundant intact cells and isolated membrane fragments

Figure S2. Schematic structures of chlorophyll

Figure S3. 2D  $^{13}\text{C}$ – $^{13}\text{C}$  photo-CIDNP DARR MAS NMR spectra of [3,4,5- $^{13}\text{C}$ ]-ALA with a mixing time of 2.5 ms obtained at 4.7 T.

Table S1.  $^{13}\text{C}$ – $^{13}\text{C}$  correlation pairs (cross peaks) from electron donor and acceptor

Figure S4. Correlation between the experimentally obtained  $^{13}\text{C}$  chemical shifts and the calculated  $^{13}\text{C}$  magnetic shieldings.

Figure S5. Correlation between experimental photo-CIDNP intensities and DFT calculations.

Table S2. Relative  $^{13}\text{C}$  photo-CIDNP intensities of the electron donor, BChl  $g'$  and calculated spin density distribution of donor triplet state.

Table S3. Relative  $^{13}\text{C}$  photo-CIDNP intensities and calculated principal hyperfine coupling tensors of electron acceptor, 8<sup>1</sup>-OH Chl  $a_F$

Figure S6. Mapping the local electron spin densities of  $^{13}\text{C}$  and  $^{15}\text{N}$  in both the donor triplet state and radical anion state within the HbRC.

Table S4.  $^{13}\text{C}$  chemical shifts of aromatic region of active cofactors (donor and acceptor) observed by photo-CIDNP MAS NMR experiment of HbRC, the RCs of *R. sphaeroides* WT and PSII (spinach).

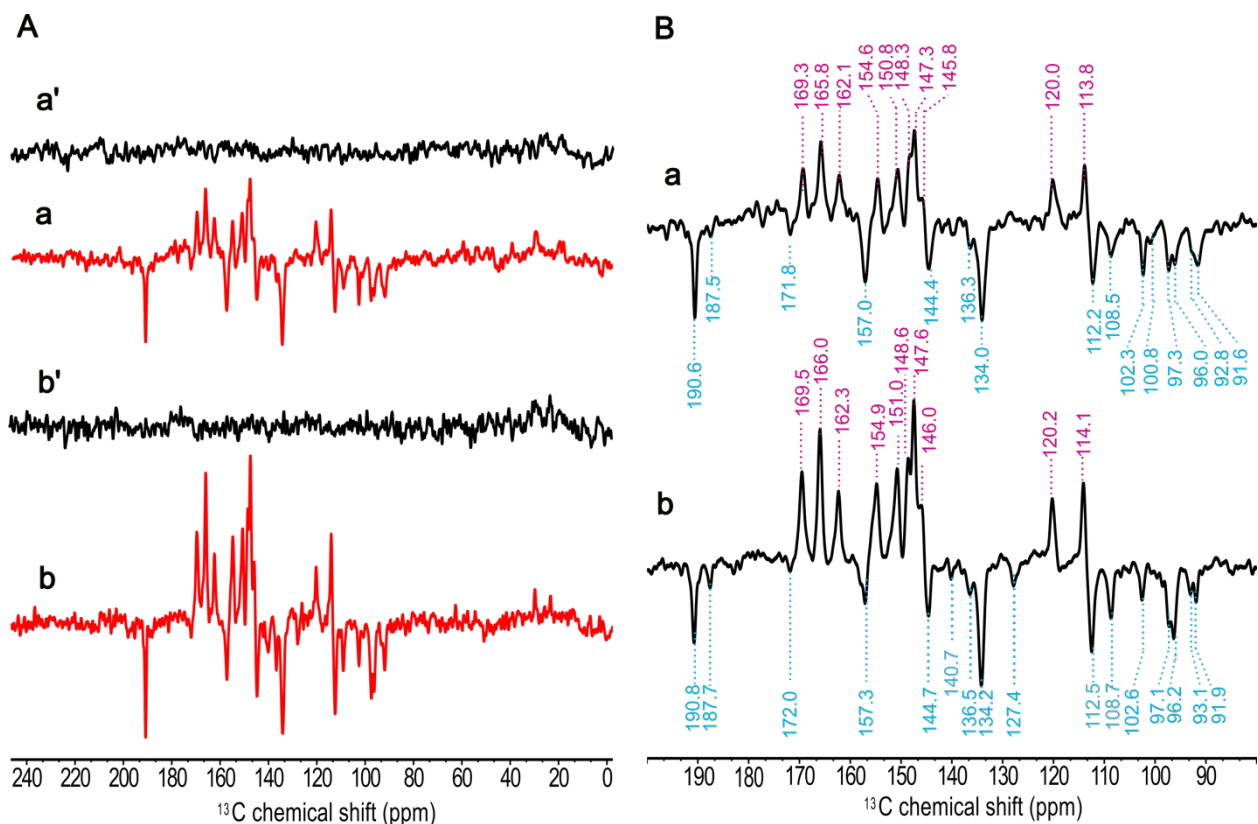

**Figure S1.** Comparison of  $^{13}\text{C}$  photo-CIDNP MAS NMR spectra from natural abundant intact cells (**a**) and isolated membrane fragments (**b**) from *Hb. mobilis* are shown in red color. The MAS NMR spectra obtained in the dark of intact cells (**a'**) and isolated membrane fragments (**b'**) are shown in black. All the spectra have been collected for 10 h under illumination with 488 nm at magnetic field of 4.7 T with a cycle delay of 4 s for 10 h. A MAS frequency of 8 kHz was employed for the experiments conducted at 235 K. Expanded light induced spectra of intact cells (**a**) and membrane fragments (**b**) in (**B**).

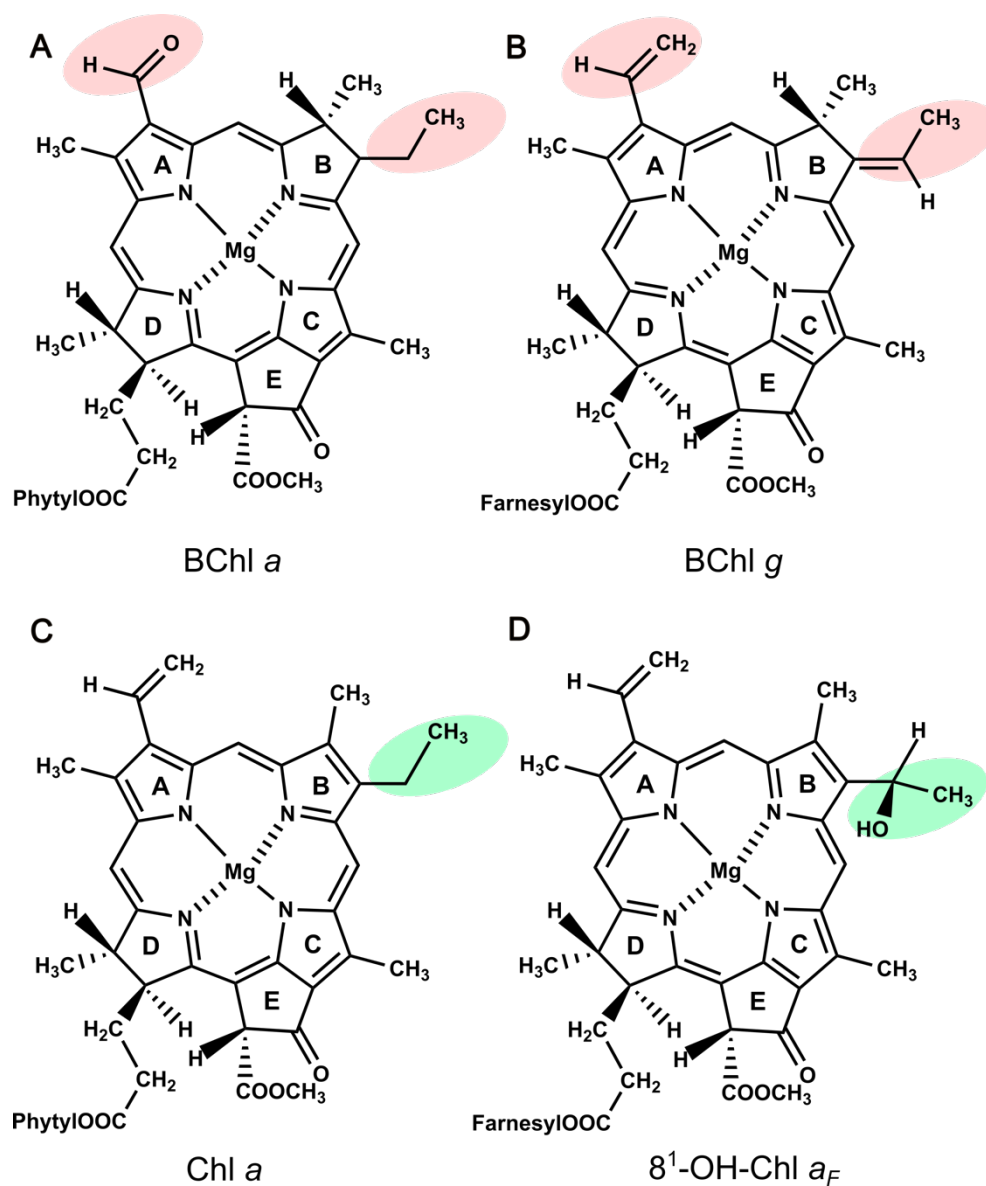

**Figure S2.** Schematic structures of Chlorophyll. BChl *a* (**A**), BChl *g* (**B**), Chl *a* (**C**), 8<sup>1</sup>-OH-Chl *a<sub>F</sub>* (**D**), [1,2]. The modifications in rings A and B between BChl *g* and BChl *a* are marked in red, while the divergence within ring B between 8<sup>1</sup>-OH-Chl *a<sub>F</sub>* and Chl *a* is indicated in green.

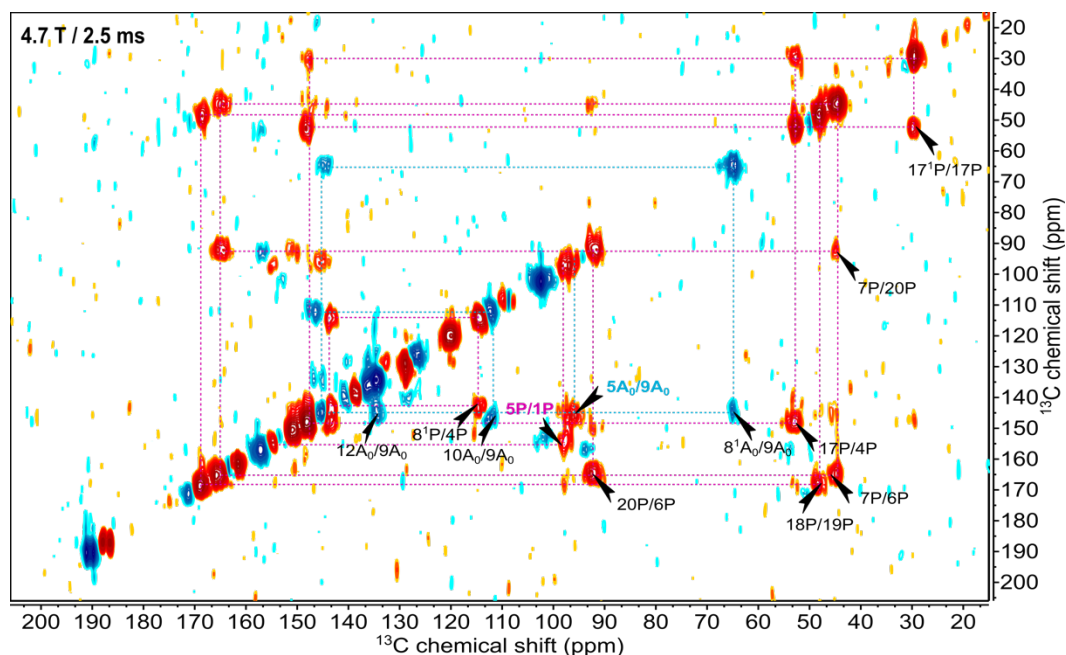

**Figure S3.** 2D  $^{13}\text{C}$ – $^{13}\text{C}$  photo-CIDNP DARR MAS NMR spectra of [3,4,5- $^{13}\text{C}$ ]-ALA labelled membrane fragments with a spin-diffusion mixing time of 2.5 ms, collected with a MAS frequency of 8 kHz at 235 K under the continuous illumination with 488 nm measured at 4.7 T. Positive contour are indicated in red, negative contour are marked in blue in the spectra.

**Table S1.**  $^{13}\text{C}$ - $^{13}\text{C}$  correlation pairs (cross peaks) from electron donor and acceptor observed in 2D  $^{13}\text{C}$ - $^{13}\text{C}$  DARR spectra with a mixing time of 50 ms at 4.7 T and 9.4 T.

| electron donor, P, BChl $g'$ |                       |                                | electron acceptor, $A_0$ , 8 <sup>1</sup> -OH-Chl $a_F$        |               |
|------------------------------|-----------------------|--------------------------------|----------------------------------------------------------------|---------------|
| No.                          | Correlation pair      | Distance, (Å)                  | Correlation pair                                               | Distance, (Å) |
| 1                            | 4P/17 <sup>1</sup> P  | 6.2 Å (inter)<br>7.3 Å (intra) | 1A <sub>0</sub> /2A <sub>0</sub>                               | 1.4 Å         |
| 2                            | 4P/17P                | 6.1 Å (inter)<br>6.5 Å (intra) | 3A <sub>0</sub> /2A <sub>0</sub>                               | 1.5 Å         |
| 3                            | 5P/9P                 | 3.6 Å                          | 3A <sub>0</sub> /13A <sub>0</sub>                              | 8.4 Å         |
| 4                            | 6P/7P                 | 1.5 Å                          | 6A <sub>0</sub> /10A <sub>0</sub>                              | 3.5 Å         |
| 5                            | 6P/20P                | 5.5 Å                          | 6A <sub>0</sub> /11A <sub>0</sub>                              | 4.2 Å         |
| 6                            | 7P/4P                 | 3.8 Å                          | 8 <sup>1</sup> A <sub>0</sub> /9A <sub>0</sub>                 | 2.5 Å         |
| 7                            | 7P/20P                | 6.5 Å (inter)<br>6.9 Å (intra) | 10A <sub>0</sub> /9A <sub>0</sub>                              | 1.5 Å         |
| 8                            | 8P/8 <sup>1</sup> P   | 1.5 Å                          | 10A <sub>0</sub> /13 <sup>1</sup> A <sub>0</sub>               | 4.9 Å         |
| 9                            | 8P/4P                 | 4.6 Å                          | 10A <sub>0</sub> /11A <sub>0</sub>                             | 1.5 Å         |
| 10                           | 13P/16P               | 3.7 Å                          | 12A <sub>0</sub> /9A <sub>0</sub>                              | 3.9 Å         |
| 11                           | 13 <sup>1</sup> P/13P | 1.5 Å                          | 12A <sub>0</sub> /10A <sub>0</sub>                             | 2.6 Å         |
| 12                           | 13 <sup>1</sup> P/14P | 2.3 Å                          | 12A <sub>0</sub> /11A <sub>0</sub>                             | 1.6 Å         |
| 13                           | 16P/17P               | 1.5 Å                          | 13A <sub>0</sub> /13 <sup>1</sup> A <sub>0</sub>               | 1.5 Å         |
| 14                           | 17P/17 <sup>1</sup> P | 1.5 Å                          | 13A <sub>0</sub> /14A <sub>0</sub>                             | 1.4 Å         |
| 15                           | 17 <sup>1</sup> P/16P | 2.5 Å                          | 13 <sup>1</sup> A <sub>0</sub> /10A <sub>0</sub>               | 3.5 Å         |
| 16                           | 18P/19P               | 1.5 Å                          | 13 <sup>1</sup> A <sub>0</sub> /12A <sub>0</sub>               | 2.8 Å         |
| 17                           | 20P/17P               | 3.8 Å                          | 13 <sup>1</sup> A <sub>0</sub> /13A <sub>0</sub>               | 1.5 Å         |
| 18                           | 8 <sup>1</sup> P/4P   | 5.5 Å (inter)<br>6.1 Å (intra) | 13 <sup>1</sup> A <sub>0</sub> /14A <sub>0</sub>               | 2.3 Å         |
| 19                           |                       |                                | 13 <sup>1</sup> A <sub>0</sub> /17 <sup>1</sup> A <sub>0</sub> | 4.7 Å         |
| 20                           |                       |                                | 13 <sup>1</sup> A <sub>0</sub> /18A <sub>0</sub>               | 5.9 Å         |
| 21                           |                       |                                | 14A <sub>0</sub> /12A <sub>0</sub>                             | 3.5 Å         |
| 22                           |                       |                                | 15A <sub>0</sub> /6A <sub>0</sub>                              | 6.3 Å         |
| 23                           |                       |                                | 15A <sub>0</sub> /14A <sub>0</sub>                             | 1.4 Å         |
| 24                           |                       |                                | 17A <sub>0</sub> /1A <sub>0</sub>                              | 4.8 Å         |
| 25                           |                       |                                | 17 <sup>1</sup> A <sub>0</sub> /1A <sub>0</sub>                | 5.7 Å         |
| 26                           |                       |                                | 17 <sup>1</sup> A <sub>0</sub> /17A <sub>0</sub>               | 1.5 Å         |
| 27                           |                       |                                | 18A <sub>0</sub> /1A <sub>0</sub>                              | 3.9 Å         |
| 28                           |                       |                                | 18A <sub>0</sub> /17 <sup>1</sup> A <sub>0</sub>               | 2.5 Å         |
| 29                           |                       |                                | 18A <sub>0</sub> /19A <sub>0</sub>                             | 1.5 Å         |
| 30                           |                       |                                | 20A <sub>0</sub> /1A <sub>0</sub>                              | 1.5 Å         |

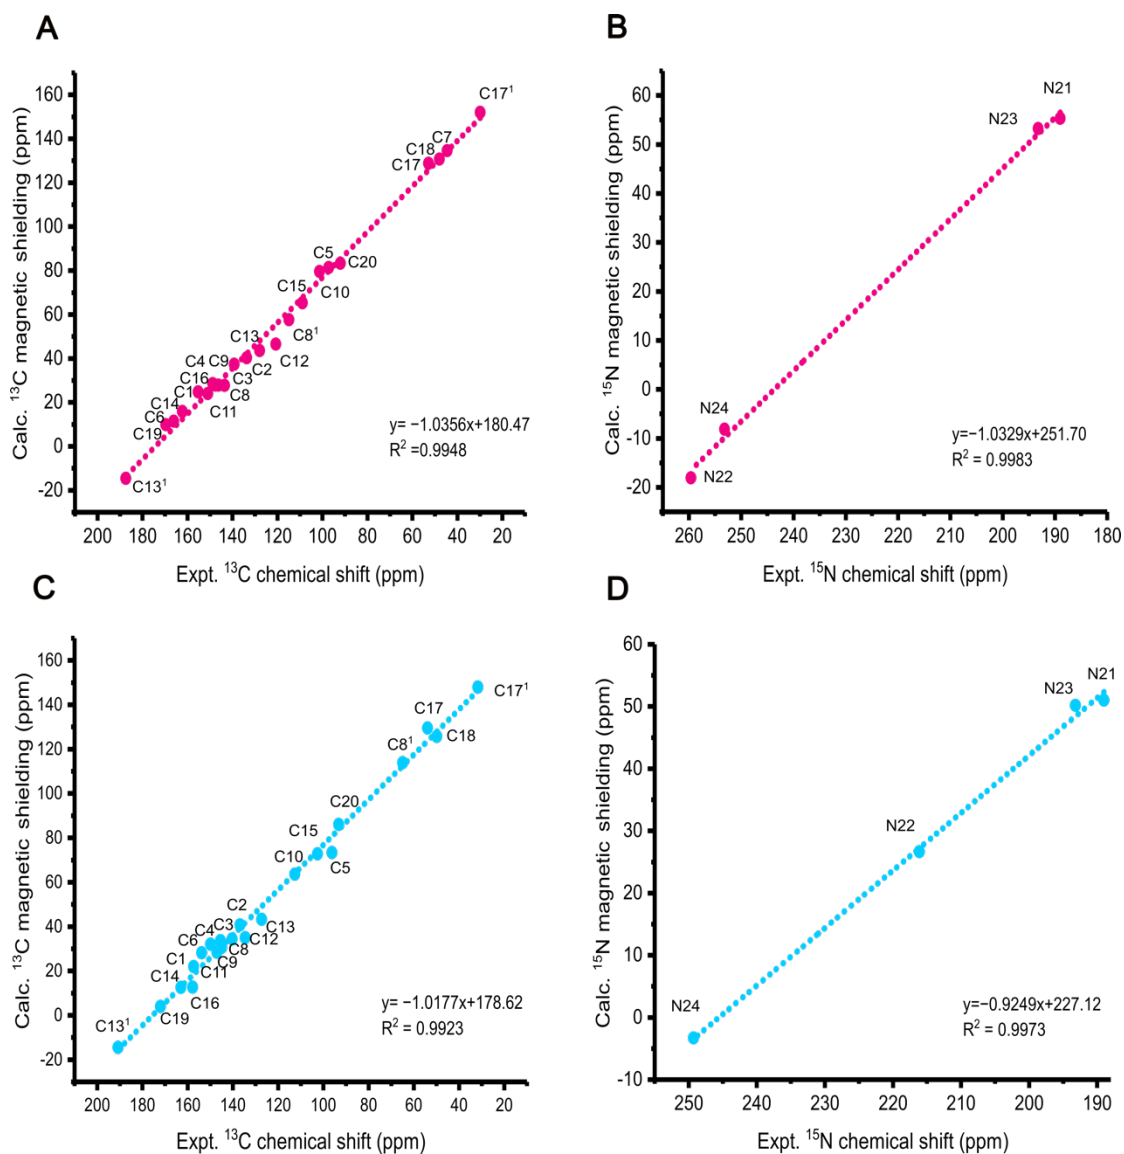

**Figure S4.** Correlation between the experimentally obtained chemical shifts and the calculated magnetic shieldings for electron donor, BChl  $g'$ , and electron acceptor, 8<sup>1</sup>-OH-Chl  $a_F$ .  $^{13}\text{C}$  of electron donor, BChl  $g'$  (**A**),  $^{15}\text{N}$  of electron donor, BChl  $g'$  (**B**),  $^{13}\text{C}$  of electron acceptor, 8<sup>1</sup>-OH-Chl  $a_F$  (**C**),  $^{15}\text{N}$  of electron acceptor, 8<sup>1</sup>-OH-Chl  $a_F$  (**D**). The dashed line represents a linear fit. With the parameters obtained from that and given as insets, we determined the chemical shifts based on the computed magnetic shieldings.

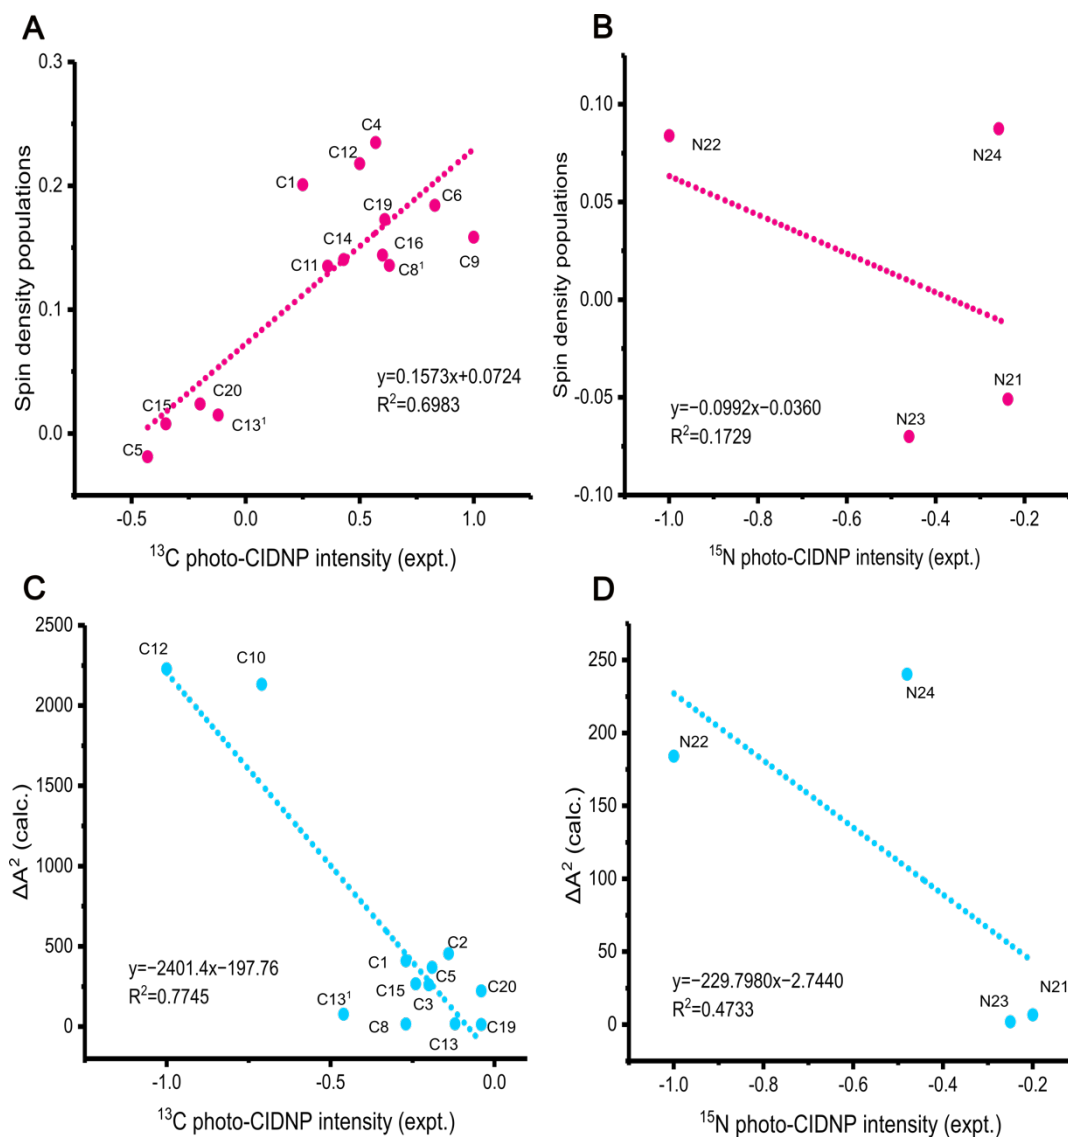

**Figure S5.** Correlation between calculated spin densities of donor triplet neutral state and experimental  $^{13}\text{C}$  photo-CIDNP intensities (**A**) and  $^{15}\text{N}$  photo-CIDNP intensities (**B**) of electron donor cofactor, BChl  $g'$ . Correlation between calculated square of  $^{13}\text{C}$  anisotropic hyperfine couplings,  $\Delta A^2$  in the radical pair anion state and experimental  $^{13}\text{C}$  photo-CIDNP intensities (**C**) and that of  $^{15}\text{N}$  photo-CIDNP intensities (**D**) of electron acceptor,  $8^1\text{-OH-Chl } a_F$ .



**Table S2.** Relative  $^{13}\text{C}$  and  $^{15}\text{N}$  photo-CIDNP intensities of the electron donor, BChl  $g'$  and spin populations from Mulliken charge analysis based on the DFT calculation for donor triplet state. The relative photo-CIDNP intensities are normalised to the highest enhanced signal.

| IUPAC<br>no.     | electron donor, BChl $g'$    |                  |
|------------------|------------------------------|------------------|
|                  | Rel. photo-CIDNP intensities | Spin Populations |
| N21              | −0.46                        | −0.0701          |
| N22              | −1.00                        | 0.0839           |
| N23              | −0.24                        | −0.0509          |
| N24              | −0.26                        | 0.0874           |
| C13 <sup>1</sup> | −0.12                        | 0.0148           |
| C19              | 0.61                         | 0.1726           |
| C6               | 0.83                         | 0.1841           |
| C14              | 0.43                         | 0.1403           |
| C1               | 0.25                         | 0.2009           |
| C16              | 0.60                         | 0.1440           |
| C4               | 0.57                         | 0.2348           |
| C9               | 1.00                         | 0.1584           |
| C11              | 0.36                         | 0.1350           |
| C8               | −                            | −0.0622          |
| C3               | −                            | 0.0460           |
| C2               | −                            | 0.0957           |
| C12              | 0.50                         | 0.2177           |
| C13              | −                            | 0.0028           |
| C3 <sup>1</sup>  |                              | −0.0268          |
| C10              |                              | 0.0679           |
| C15              | −0.35                        | 0.0077           |
| C5               | −0.43                        | −0.0190          |
| C20              | −0.20                        | 0.0237           |
| C8 <sup>1</sup>  | 0.63                         | 0.1356           |
| C17              | −                            | −0.0069          |
| C18              | −                            | −0.0070          |
| C7               | −                            | −0.0145          |
| C17 <sup>1</sup> | −                            | 0.0080           |

**Table S3.** Relative  $^{13}\text{C}$  and  $^{15}\text{N}$  photo-CIDNP intensities together with principal hyperfine coupling tensor components ( $A_{xx}$ ,  $A_{yy}$ ,  $A_{zz}$ ) and hyperfine anisotropy ( $\Delta A$ )\* from DFT calculations for radical anion state of the electron acceptor, 8<sup>1</sup>-OH-Chl  $a_F$ . The relative photo-CIDNP intensities are normalised to the highest enhanced signal. \* $\Delta A = A_{zz} - (A_{xx} + A_{yy})/2$

| IUPAC<br>no.     | electron acceptor, 8 <sup>1</sup> -OH-Chl $a_F$ |          |          |          |              |
|------------------|-------------------------------------------------|----------|----------|----------|--------------|
|                  | Rel. photo- CIDNP intensities                   | $A_{xx}$ | $A_{yy}$ | $A_{zz}$ | $\Delta A^*$ |
| N21              | −0.20                                           | −0.4632  | −0.5152  | −3.0483  | −2.5591      |
| N22              | −1.00                                           | −0.5062  | −0.8400  | 12.8887  | 13.5618      |
| N23              | −0.24                                           | −0.1581  | −0.2626  | −1.5625  | −1.3522      |
| N24              | −0.48                                           | −0.6647  | −0.9289  | 14.7027  | 15.4995      |
| C13 <sup>1</sup> | −0.46                                           | −2.4454  | −3.4625  | 5.8249   | 8.7789       |
| C19              | −0.04                                           | 0.0382   | −5.1689  | −6.1449  | −3.5796      |
| C6               | −                                               | −3.3074  | −5.1041  | −6.1924  | −1.9867      |
| C14              | −                                               | 1.4480   | −2.3033  | −2.8259  | −2.3983      |
| C1               | −0.27                                           | −3.0928  | −3.9093  | 16.7274  | 20.2285      |
| C16              | −                                               | −5.1076  | −6.1252  | −6.7883  | −1.1719      |
| C4               | −                                               | −2.3465  | −3.0161  | 11.7731  | 14.4544      |
| C9               | −                                               | −9.0819  | −10.5905 | −20.9684 | −11.1322     |
| C11              | −                                               | −10.4550 | −11.6159 | −12.2899 | −1.2545      |
| C8               | −0.27                                           | 1.4554   | 1.7801   | 5.6359   | 4.0182       |
| C3               | −0.20                                           | −3.4671  | −3.7998  | 12.5049  | 16.1384      |
| C2               | −0.14                                           | −4.0087  | −4.1804  | 17.2217  | 21.3163      |
| C12              | −1.00                                           | −0.0013  | −0.3822  | 47.0085  | 47.2003      |
| C13              | −0.12                                           | −1.7366  | −7.2541  | −8.6588  | −4.1635      |
| C3 <sup>1</sup>  | −                                               | −3.3931  | −3.8980  | −6.7492  | −3.1037      |
| C10              | −0.71                                           | 0.5417   | 0.6769   | 46.7797  | 46.1704      |
| C15              | −0.24                                           | −1.0938  | −1.4273  | 15.0635  | 16.3241      |
| C5               | −0.19                                           | −2.3459  | −2.6928  | 16.6668  | 19.1862      |
| C20              | −0.04                                           | −3.4657  | −4.0764  | 11.1384  | 14.9095      |
| C8 <sup>1</sup>  | −                                               | −0.4432  | −0.6803  | −0.7641  | −0.2024      |
| C17              | −                                               | 0.0000   | 0.0563   | −0.3653  | −0.3935      |
| C18              | −                                               | −0.9027  | −1.0728  | −1.2477  | −0.2600      |
| C7               | −                                               | −1.2166  | −1.3661  | −8.6795  | −7.3882      |
| C17 <sup>1</sup> | −                                               | 0.8476   | 1.0792   | 1.3027   | 0.3393       |

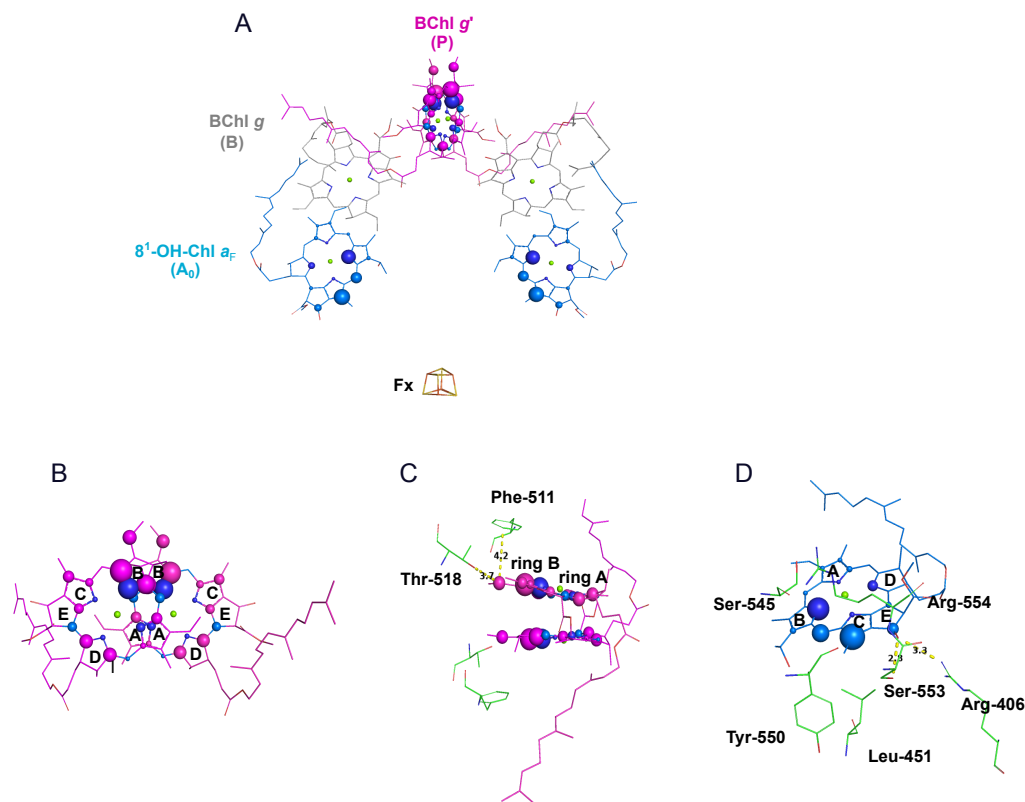

**Figure S6.** Map of local electron-spin densities for  $^{13}\text{C}$  and  $^{15}\text{N}$  in the donor triplet state and radical anion state within the HbRC (**A**) based on solid-state photo-CIDNP intensities. Positive  $^{13}\text{C}$  signals are depicted in red, while negative ones appear in blue; negative  $^{15}\text{N}$  signals are marked in dark blue. The size of the spheres roughly corresponds to the signal intensity. Spin density patterns of the overlapped special pair in the donor triplet state (**B**), and demonstrating interactions with nearby amino acid residues around ring B (**C**). The distances are represented by dotted lines and labels. The spin density patterns of the primary electron acceptor in the radical pair anion state are depicted, highlighting interactions where Ser-553 and Arg-406 form a hydrogen bond with the  $^{13}\text{C}$  keto oxygen. [The figure was prepared with the PyMOL Molecular Graphics System, version 2.5 Schrödinger, LLC].

**Table S4.** Chemical shifts for the aromatic region of active cofactors (donor and acceptor) observed photo-CIDNP MAS NMR experiment of HbRC, the RCs of *R. sphaeroides* WT and PSII of spinach (unit: ppm of chemical shift scale)

|              | HbRC*           |                                              |                                           | <i>R. sphaeroides</i> WT                     |                                              |                                               |                           |                                           | PSII of spinach     |                       |                                           |
|--------------|-----------------|----------------------------------------------|-------------------------------------------|----------------------------------------------|----------------------------------------------|-----------------------------------------------|---------------------------|-------------------------------------------|---------------------|-----------------------|-------------------------------------------|
|              | Donor           | Acceptor                                     | OCSD<br>$\Delta\delta$<br>(Acc.-<br>Don.) | Donor                                        |                                              |                                               | Acceptor                  | OCSD<br>$\Delta\delta$<br>(Acc.-<br>Don.) | Donor               | Acceptor              | OCSD<br>$\Delta\delta$<br>(Acc.-<br>Don.) |
| IUPAC<br>no. | BChl <i>g</i> ' | 8 <sup>l</sup> -OH-Chl <i>a</i> <sub>F</sub> |                                           | BChl <i>a</i><br>(P <sub>L</sub> ),<br>[3,5] | BChl <i>a</i><br>(P <sub>M</sub> ),<br>[3,5] | Averaged<br>(P <sub>L</sub> +P <sub>M</sub> ) | BPheo <i>a</i> ,<br>[4,5] |                                           | Chl <i>a</i><br>[6] | Phe <i>a</i><br>[6,7] |                                           |
| C1           | 155.2           | 157.3                                        | 2.1                                       | 144.1                                        | 144.8                                        | 144.45                                        | 141.2                     | -3.3                                      | 156                 | 141.0                 | -15.0                                     |
| C2           | 133.6           | 136.8                                        | 3.2                                       | 135.1                                        | 137.1                                        | 136.1                                         | 138.7                     | 2.6                                       | 136.5               | 131.0                 | -5.5                                      |
| C3           | 139.2           | 140.3                                        | 1.1                                       | 129.5                                        | 129.8                                        | 129.65                                        | 133.5                     | 3.9                                       | 137.4               | 136.5                 | -0.9                                      |
| C4           | 148.8           | 149.9                                        | 1.1                                       | 137.0                                        | 145.9                                        | 141.45                                        | 137.8                     | -3.6                                      | 150.1               | 137.0                 | -13.1                                     |
| C5           | 97.2            | 96.2                                         | -1.0                                      | 97.8                                         | 101.7                                        | 99.75                                         | 98.5                      | -1.3                                      | 98.1                | 97.0                  | -1.1                                      |
| C6           | 166.1           | 153.8                                        | -12.3                                     | 167.7                                        | 167.3                                        | 167.5                                         | 165.1                     | -2.4                                      | 154.3               | 156.0                 | 1.1                                       |
| C9           | 147.6           | 145.5                                        | -2.1                                      | 160.8                                        | 159.8                                        | 160.3                                         | 162.7                     | 2.4                                       | 146.0               | 148.5                 | 2.5                                       |
| C10          | 101.3           | 112.6                                        | 11.3                                      | 99.5                                         | 100.2                                        | 99.85                                         | 102.5                     | 2.65                                      | 108.2               | 104.7                 | -3.5                                      |
| C11          | 146.2           | 147.0                                        | 0.8                                       | 153.7                                        | 154.7                                        | 154.2                                         | 139.5                     | -14.7                                     | 151.6               | 138.0                 | -13.6                                     |
| C12          | 120.7           | 134.6                                        | 13.9                                      | 120.3                                        | 128.8                                        | 124.55                                        | 126.9                     | 2.4                                       | 133.7               | 128.95                | -4.75                                     |
| C13          | 127.9           | 127.3                                        | -0.6                                      | 131.6                                        | 130.7                                        | 131.15                                        | 127.5                     | -3.7                                      | 129.5               | 130.0                 | 0.5                                       |
| C14          | 162.3           | 163.0                                        | 0.7                                       | 158.7                                        | 161.5                                        | 160.1                                         | 150.0                     | -10.1                                     | 162.2               | 151.0                 | -11.2                                     |
| C15          | 108.9           | 102.6                                        | -6.3                                      | 104.7                                        | 107.4                                        | 106.05                                        | 109.5                     | 3.5                                       | 102.8               | 106.9                 | 4.1                                       |
| C16          | 151.0           | 157.8                                        | 6.8                                       | 149.0                                        | 158.4                                        | 153.7                                         | 157.7                     | 4.0                                       | 157.4               | 160.7                 | 3.3                                       |
| C19          | 169.6           | 172.0                                        | 2.4                                       | 161.7                                        | 169.5                                        | 165.6                                         | 170.8                     | 5.2                                       | 166.8               | 172.2                 | 5.4                                       |
| C20          | 92.0            | 93.2                                         | 1.2                                       | 95.4                                         | 104                                          | 99.7                                          | 94.2                      | -5.5                                      | 93.3                | 93.0                  | -0.3                                      |
| SUM          | 2167.6          | 2189.9                                       | 22.3                                      | 2146.6                                       | 2201.6                                       | 2174.1                                        | 2156.1                    | -18.0                                     | 2183.9              | 2132.45               | -51.45                                    |

\*The chemical shifts of cofactors of HbRC were based on experimental data obtained from this study.

## References

1. Qiu, N.W.; Jiang, D.C.; Wang, X.S.; Wang, B.S.; Zhou, F. Advances in the Members and Biosynthesis of Chlorophyll Family. *Photosynthetica* **2019**, *57*, 974–984, doi:10.32615/ps.2019.116.
2. Tsukatani, Y.; Yamamoto, H.; Mizoguchi, T.; Fujita, Y.; Tamiaki, H. Completion of Biosynthetic Pathways for Bacteriochlorophyll g in *Heliobacterium Modesticaldum*: The C8-Ethylidene Group Formation. *Biochim. Biophys. Acta - Bioenerg.* **2013**, *1827*, 1200–1204, doi:10.1016/j.bbabo.2013.06.007.
3. Sai Sankar Gupta, K.B.; Daviso, E.; Jeschke, G.; Alia, A.; Ernst, M.; Matysik, J. Spectral Editing through Laser-Flash Excitation in Two-Dimensional Photo-CIDNP MAS NMR Experiments. *J. Magn. Reson.* **2014**, *246*, 9–17, doi:10.1016/j.jmr.2014.06.007.
4. Sai Sankar Gupta, K.B.; Alia, A.; Buda, F.; De Groot, H.J.M.; Matysik, J. Bacteriopheophytin a in the Active Branch of the Reaction Center of *Rhodobacter Sphaeroides* Is Not Disturbed by the Protein Matrix as Shown by  $^{13}\text{C}$  Photo-CIDNP MAS NMR. *J. Phys. Chem. B* **2013**, *117*, 3287–3297, doi:10.1021/jp3121319.
5. Gräsing, D. Photo-CIDNP MAS NMR — Generation, Transfer and Application of Nuclear Hyperpolarization, Ph.D. thesis, Universität Leipzig, Leipzig, Germany; 2019.
6. Janssen, G.J.; Bielytskyi, P.; Artiukhin, D.G.; Neugebauer, J.; de Groot, H.J.M.; Matysik, J.; Alia, A. Photochemically Induced Dynamic Nuclear Polarization NMR on Photosystem II: Donor Cofactor Observed in Entire Plant. *Sci. Rep.* **2018**, *8*, 17853, doi:10.1038/s41598-018-36074-z.
7. Egorova-Zachernyuk, T.A.; Van Rossum, B.; Boender, G.J.; Franken, E.; Ashurst, J.; Raap, J.; Gast, P.; Hoff, A.J.; Oschkinat, H.; De Groot, H.J.M. Characterization of Pheophytin Ground States in *Rhodobacter Sphaeroides* R26 Photosynthetic Reaction Centers from Multispin Pheophytin Enrichment and 2-D  $^{13}\text{C}$  MAS NMR Dipolar Correlation Spectroscopy. *Biochemistry* **1997**, *36*, 7513–7519, doi:10.1021/bi962770m.
